# Supplementary material for: Preparation of graphene/tetrathiafulvalene nanocomposite switchable surfaces
Source: Royal Society of Chemistry journal article supplement (doi:10.1039/c1cc15215g), 2011-11-01
Supplement: c1cc15215g.pdf [file c1cc15215g.pdf]

## Supporting Information

### Preparation of graphene/tetrathiafulvalene nanocomposite switchable surfaces

Izabela Kaminska, Manash R. Das, Joanna Niedziolka-Jonsson, Patrice Woisel, Marcin Opallo, Sabine Szunerits and Rabah Boukherroub

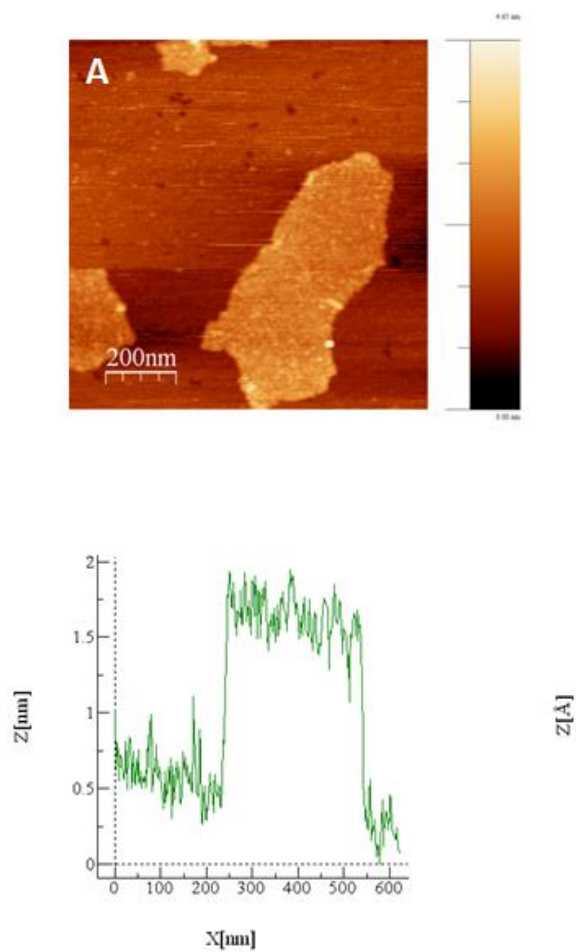

**Figure S1.** Tapping-mode AFM images of graphene oxide (GO) deposited on mica.

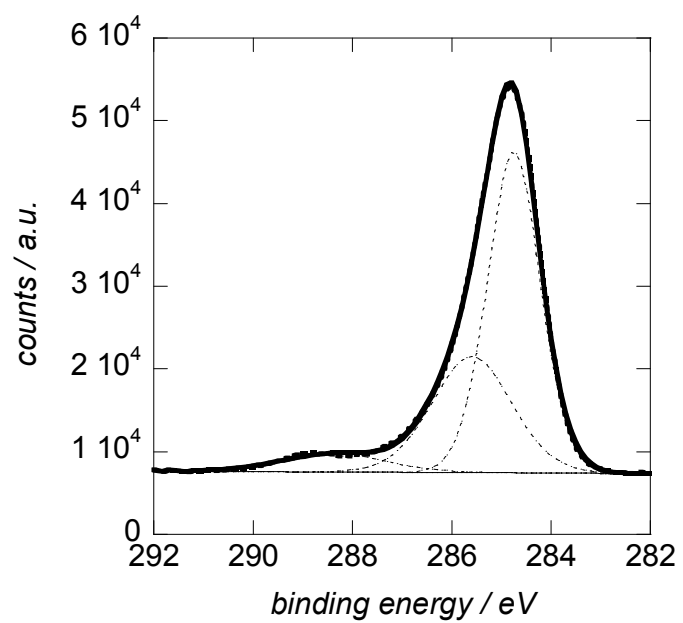

**Figure S2.** XPS core level spectrum of hydrazine modified GO

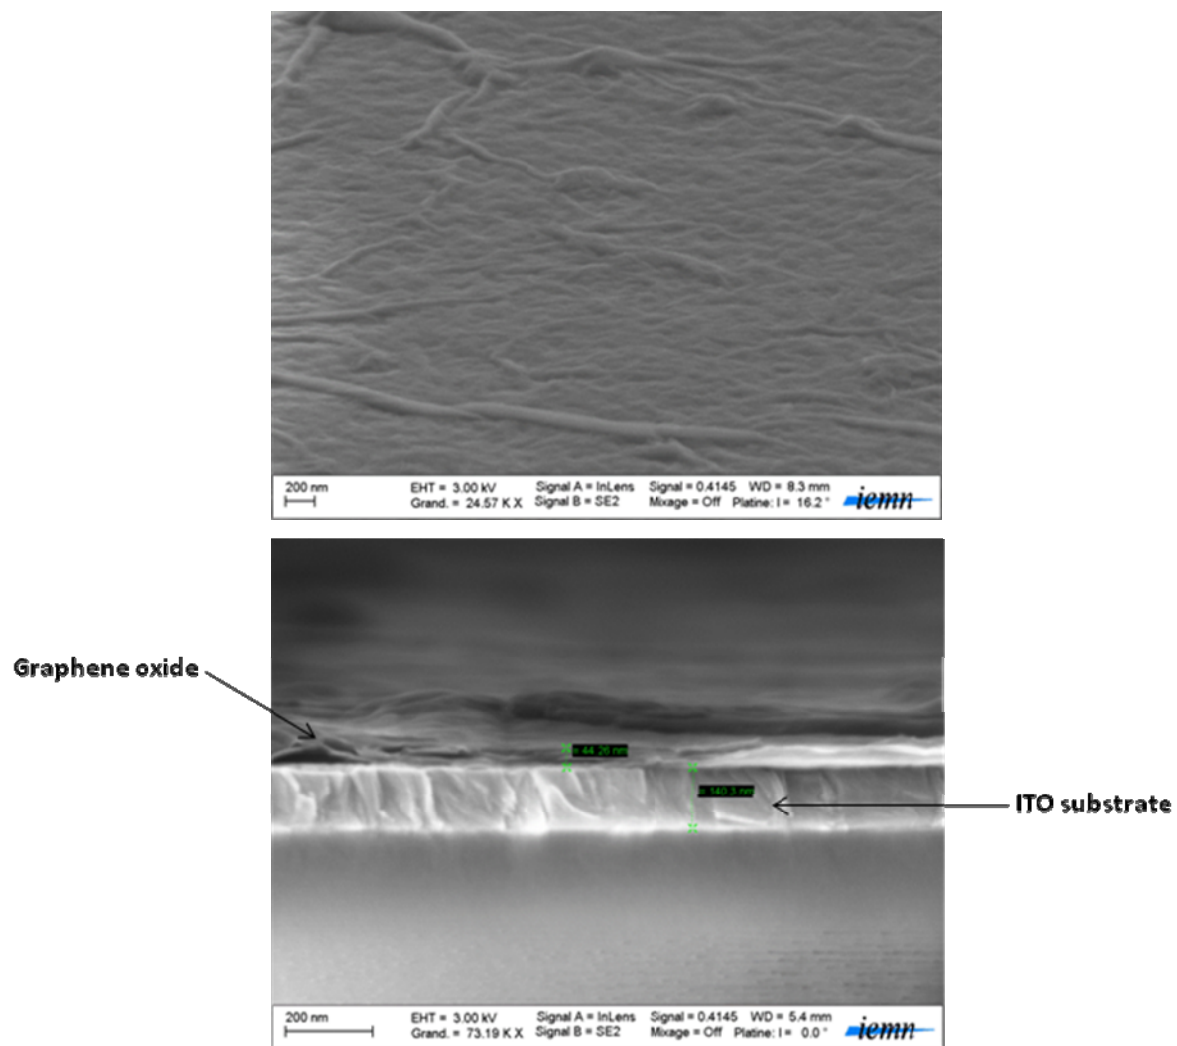

**Figure S3.** Scanning electron microscopy images of GO deposited on ITO by drop casting. The thickness of the GO film is about 44 nm.

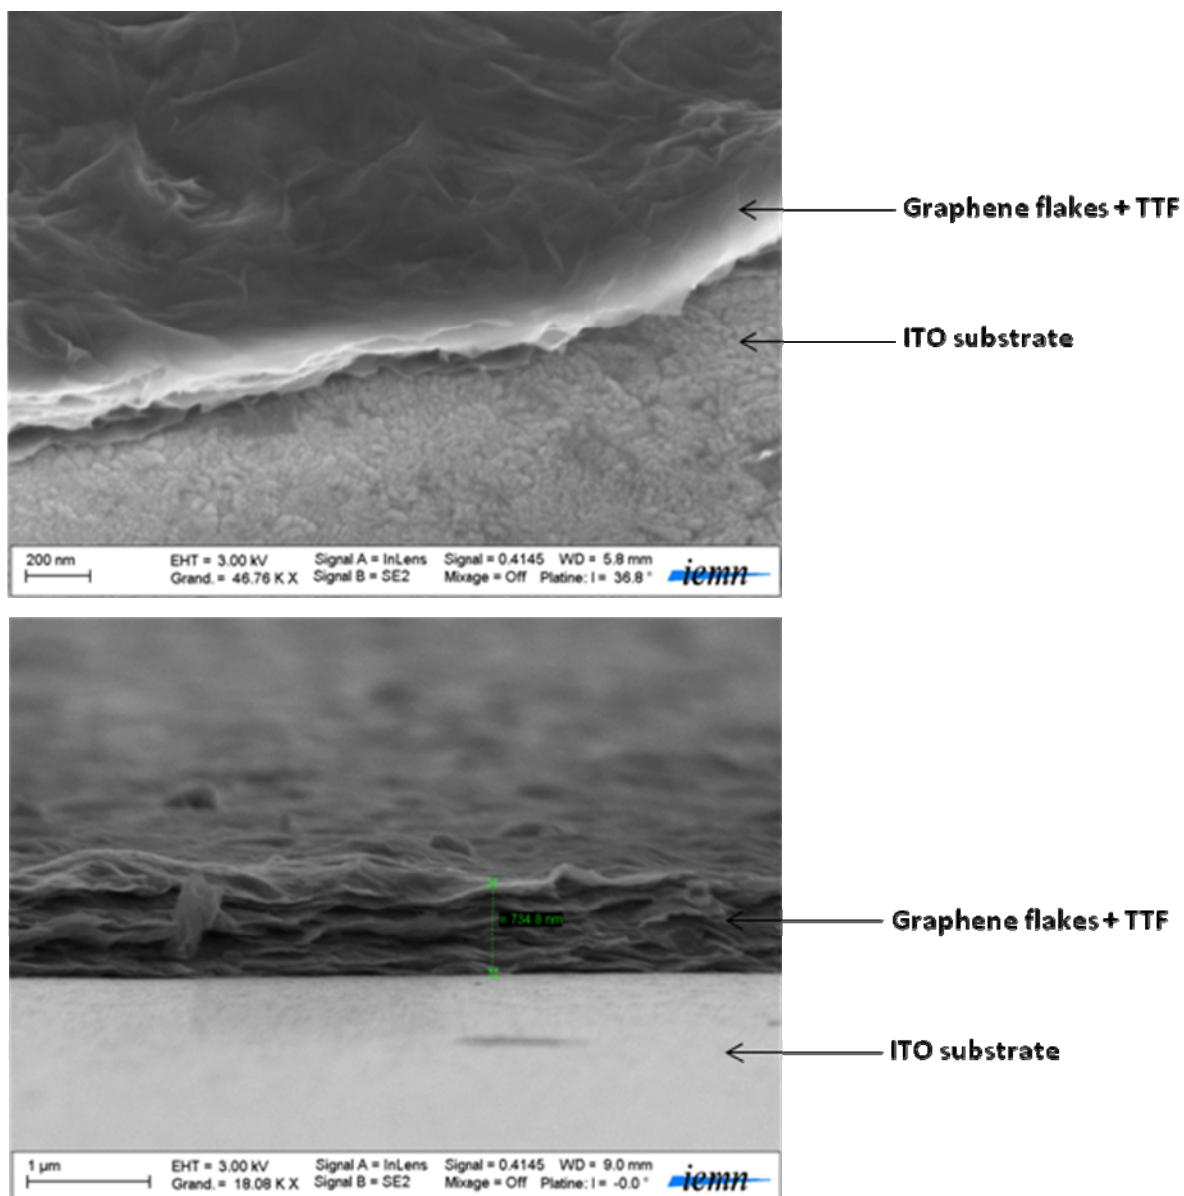

**Figure S4.** Scanning electron microscopy images of a graphene/TTF film deposited on ITO by drop casting. The thickness of the GO film is about 735 nm.
